# Supplementary material for: Vitamin C alleviates acute enterocolitis in Campylobacter jejuni infected mice
Source: PubMed Central journal article supplement (PMC7031283; doi:10.1038/s41598-020-59890-8), 2020-02-19
Supplement: 41598_2020_59890_MOESM5_ESM.pdf [file 41598_2020_59890_MOESM5_ESM.pdf]

# **Vitamin C alleviates acute enterocolitis in *Campylobacter jejuni* infected mice**

**Soraya Mousavi, Ulrike Escher, Elisa Thunhorst, Sophie Kittler, Corinna Kehrenberg,  
Stefan Bereswill and Markus M. Heimesaat**

**Representative photomicrographs of immunohistochemically stained colonic paraffin sections taken from ascorbate treated, *C. jejuni* infected mice.** Starting four days before peroral *C. jejuni* infection, secondary abiotic IL-10<sup>-/-</sup> mice were treated with synthetic ascorbate (ASCOR) or placebo (PLC) via the drinking water. Naive mice served as uninfected and untreated controls. **(A)** macrophages and monocytes (positive for F4/80), **(B)** T lymphocytes (positive for CD3), and **(C)** B lymphocytes (positive for B220) in the colonic mucosa and lamina propria were quantitatively assessed microscopically in immunohistochemically stained large intestinal paraffin sections at day 6 post-infection. Photomicrographs shown are representative for four independent experiments.

# A Macrophages / Monocytes (COLON)

Naive

PLC

ASCOR

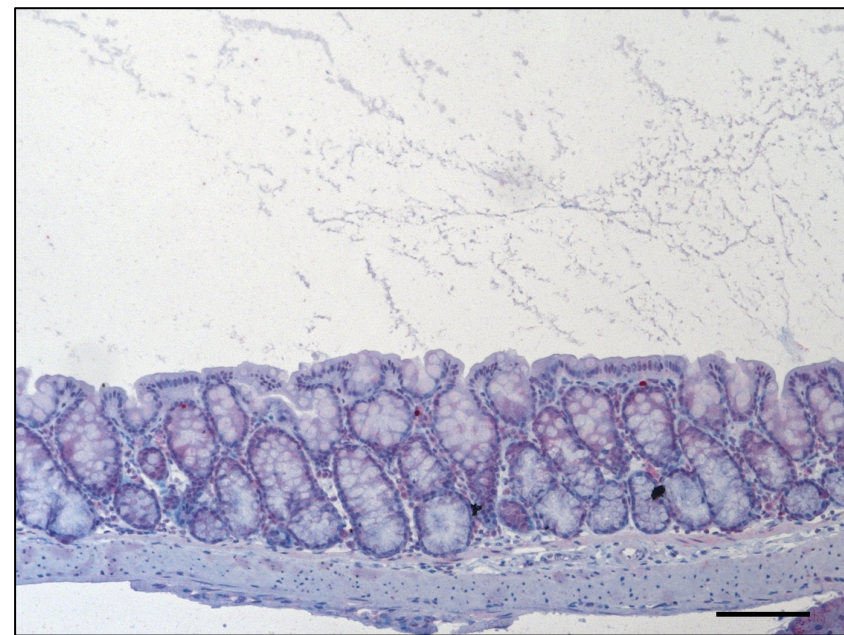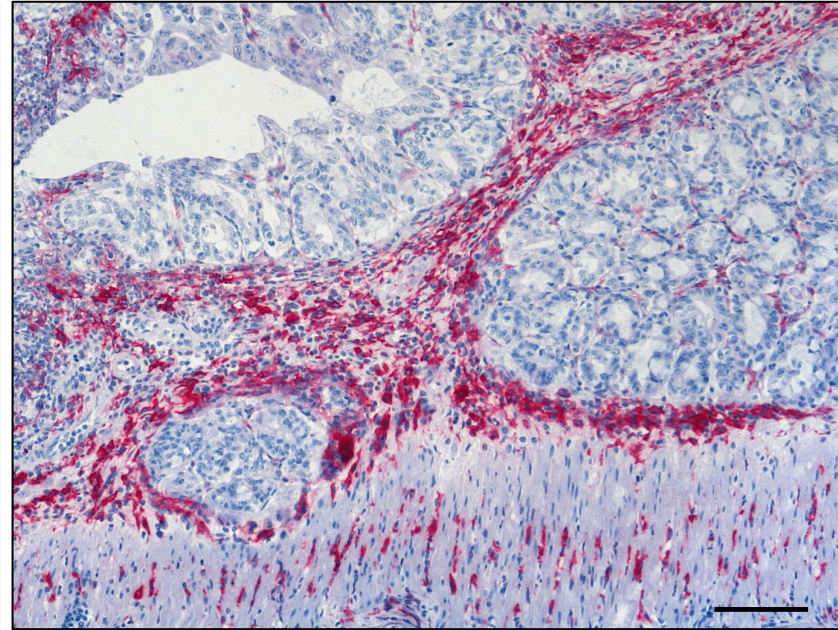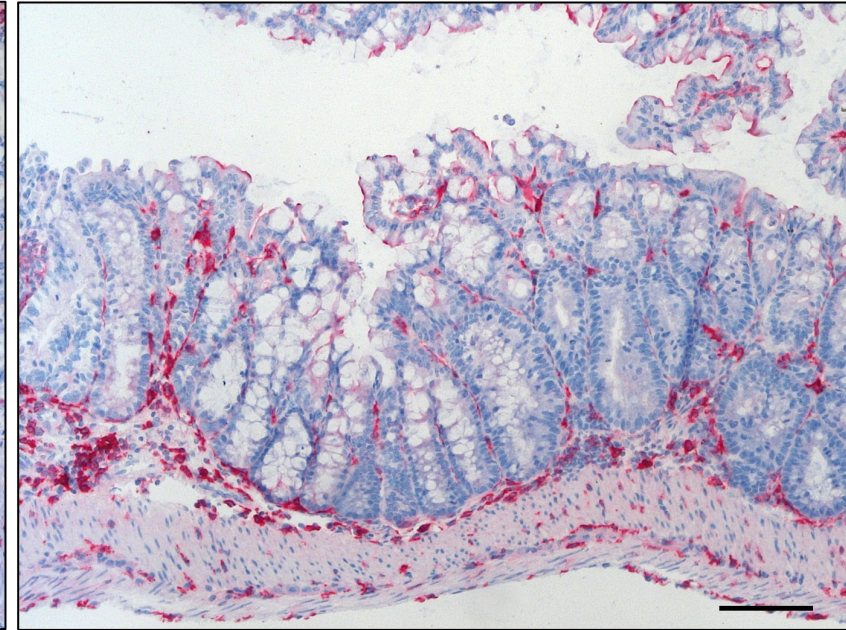

(100 x magnification, scale bar 100  $\mu$ m)

# **B T Lymphocytes (COLON)**

**Naive**

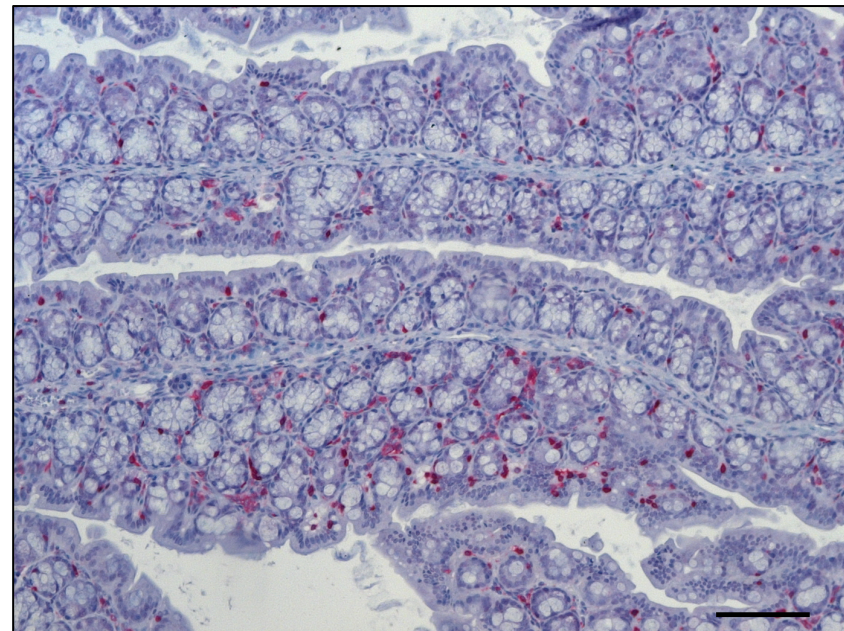

**PLC**

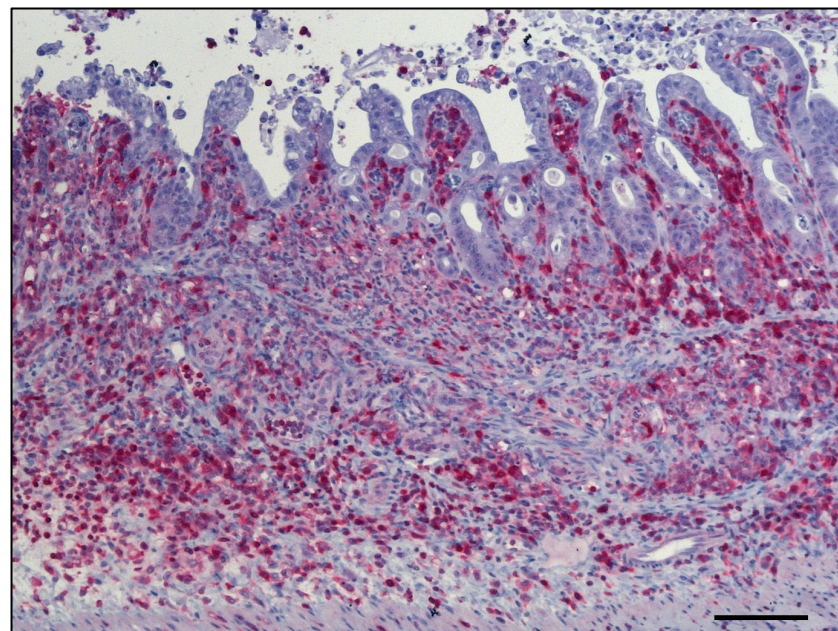

**ASCOR**

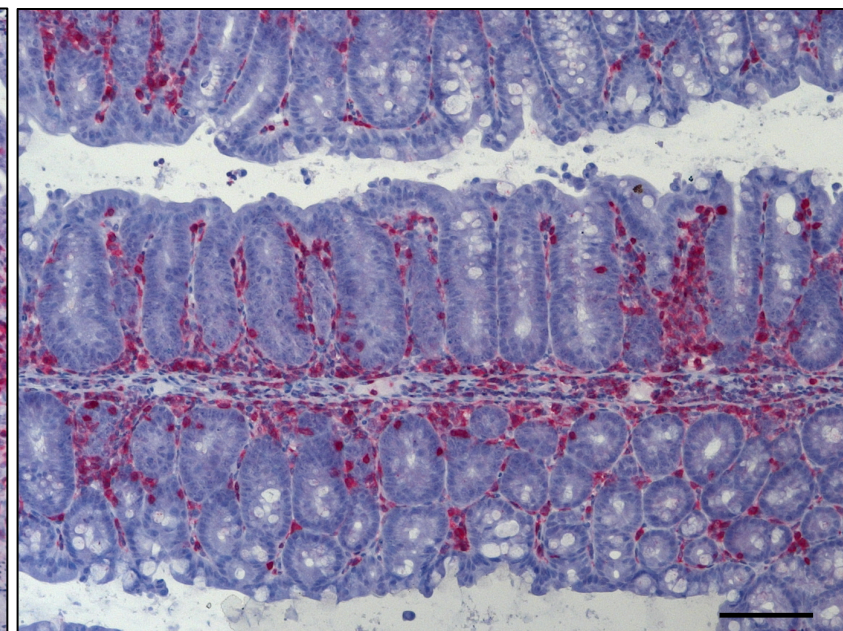

**(100 x magnification, scale bar 100  $\mu$ m)**

# C B Lymphocytes (COLON)

**Naive**

**PLC**

**ASCOR**

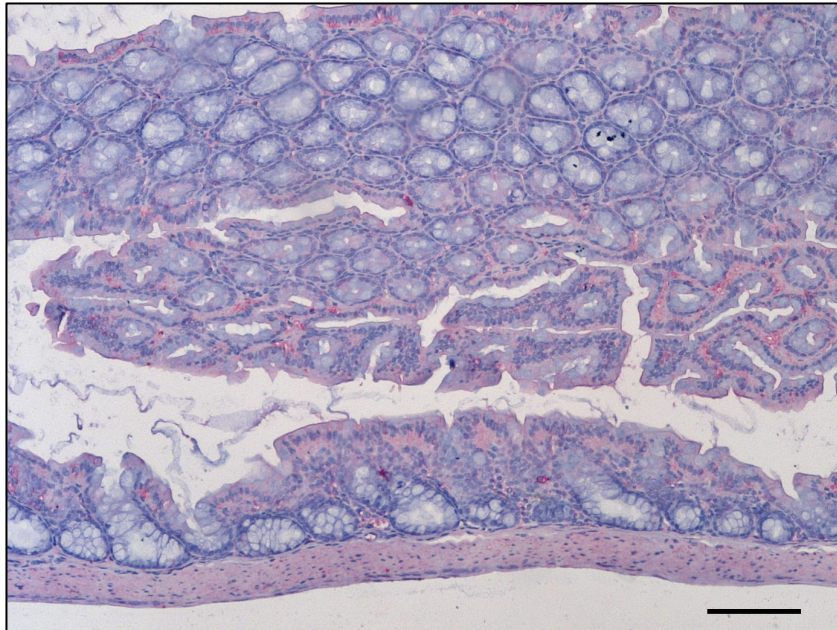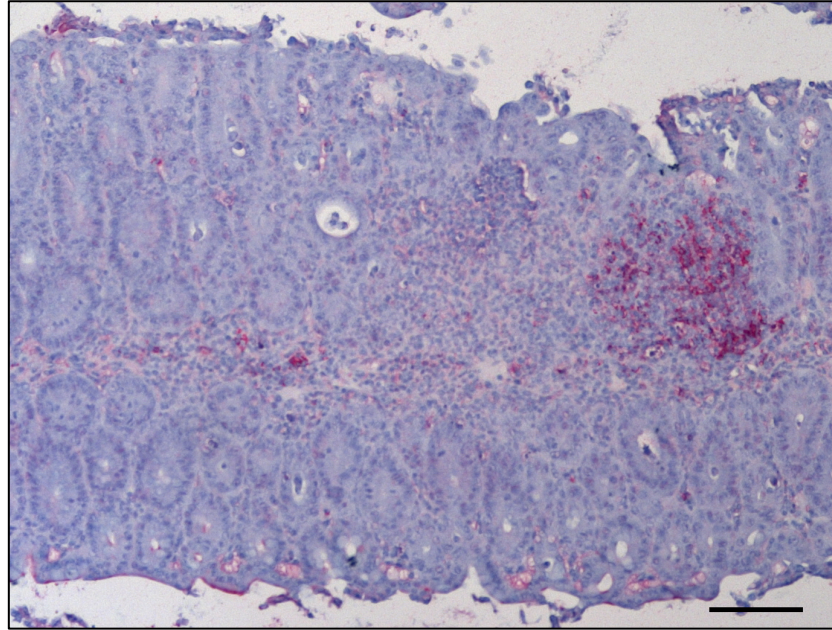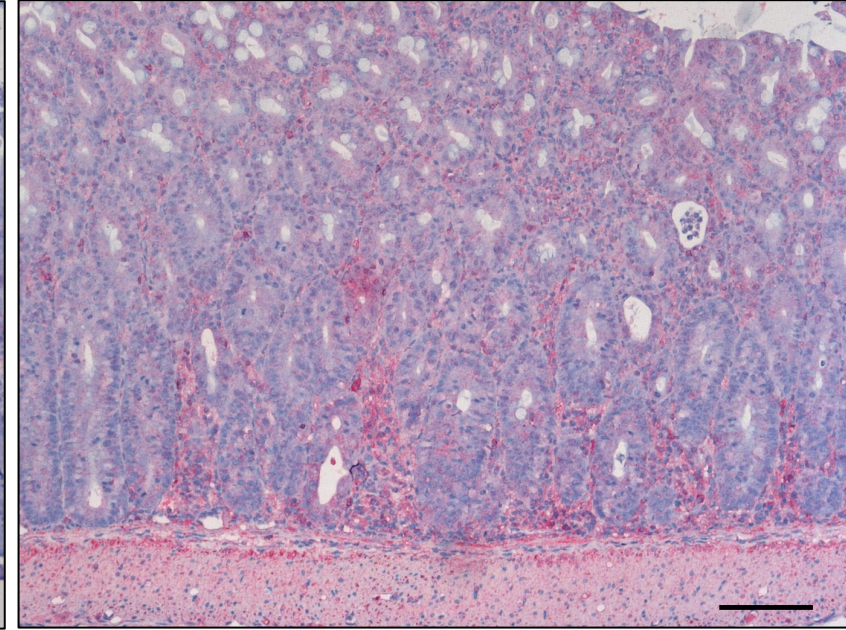

(100 x magnification, scale bar 100  $\mu\text{m}$ )
